# Supplementary material
Source: publisher figshare collection journal article supplement (https://frontiersin.figshare.com/ndownloader/files/21972753)
Supplement: Supplementary file [file 21972753]

Supplementary Table 1. Percentage of correct responses for task 1 (classification of actions) and task 2 (identification of specific action) for each of the Social Perception and Interaction Database animations.

| <b>Communicative interactions</b>              |                                                                                                                |                                               |                                                                     |
|------------------------------------------------|----------------------------------------------------------------------------------------------------------------|-----------------------------------------------|---------------------------------------------------------------------|
| NAME                                           | DESCRIPTION                                                                                                    | IDENTIFICATION OF SPECIFIC ACTION (% correct) | CLASSIFICATION OF ACTIONS (COMMUNICATIVE vs INDIVIDUAL) (% correct) |
| "Hello"                                        | A waves to B, B waves back to A.                                                                               | 70                                            | 90                                                                  |
| "Come closer"                                  | A asks B to come closer, B comes closer.                                                                       | 100                                           | 100                                                                 |
| "Squat down"                                   | A asks B to squat down, B squats down.                                                                         | 70                                            | 90                                                                  |
| "Stand up"                                     | A asks B to stand up, B stands up.                                                                             | 100                                           | 100                                                                 |
| "Look there"                                   | A points something in the sky, B looks at it.                                                                  | 42.5                                          | 95                                                                  |
| "Sit down"                                     | A asks B to sit down, B sits down.                                                                             | 100                                           | 100                                                                 |
| "Give me that"                                 | A points something to B, B lifts it and gives it to A.                                                         | 40                                            | 95                                                                  |
| "Look at this"                                 | A points something on the floor to B and squats down to look at it, B squats down next to A to look at it.     | 100                                           | 100                                                                 |
| "Pick it up"                                   | A points something on the floor to B, B picks it up and hides in a pocket.                                     | 85                                            | 95                                                                  |
| "Go over there"                                | A asks B to go away, B turns around and leaves.                                                                | 72.5                                          | 85                                                                  |
| "Cheer up (effective)"                         | A squats on the floor and is crying, B comes closer to A and puts hand on A's shoulder, A stands up.           | NA                                            | NA                                                                  |
| "Cheer up (ineffective)"                       | A squats on the floor and is crying, B comes closer to A and puts hand on A's shoulder, A shakes B's hand off. | NA                                            | NA                                                                  |
| <b>Emotional interactions: Angry exchanges</b> |                                                                                                                |                                               |                                                                     |
| "Denying accusations"                          | A accuses B of something, B denies it.                                                                         | 87.5                                          | 97.5                                                                |

|                                                |                                                                                |       |      |
|------------------------------------------------|--------------------------------------------------------------------------------|-------|------|
| “Altercation”                                  | A and B quarrel with each other.                                               | NA    | NA   |
| “Taking the blame”                             | A accuses B of something, B takes blame.                                       | 97.5  | 95   |
| “Stopping the conversation”                    | A accuses B of something, B says ‘Stop’.                                       | 55    | 90   |
| “Fuming with rage”                             | A and B jump furiously.                                                        | 50    | NA   |
| “Confronting an aggressor”                     | A comes at B, B stops A with a hand.                                           | 97.5  | 97.5 |
| <b>Emotional interactions: Happy exchanges</b> |                                                                                |       |      |
| “Jumping for joy”                              | A and B start jumping for joy.                                                 | 93.75 | 85   |
| “Enjoying success”                             | A and B are excited and they give each other high five.                        | 87.5  | 92.5 |
| “Celebrating and hugging”                      | A and B jump for joy and hug each other.                                       | 100   | 97.5 |
| “Sharing a great news”                         | A tells some good news to B, B starts jumping.                                 | 85    | 80   |
| “Dancing of joy”                               | A and B dance to celebrate some success.                                       | 92.5  | NA   |
| <b>Non-object related individual actions</b>   |                                                                                |       |      |
| “Walking”                                      | Agent walks towards the camera.                                                | 92.5  | -    |
| “Jumping jacks”                                | Agent does three jumping jacks.                                                | 97.5  | -    |
| “Jumping up and down”                          | Agent jumps up and down.                                                       | 97.5  | -    |
| “Jumping front and back”                       | Agent does forward jump toward the camera and then immediately jumps backward. | 92.5  | -    |
| “Arm waving”                                   | Agent swings arms back and forth.                                              | 100   | -    |
| “Hip swinging”                                 | Agent does hip swinging exercise.                                              | 100   | -    |
| “Torso twist”                                  | Agent does torso twist exercise.                                               | 100   | -    |
| “A-Skip”                                       | Agent does A-skip exercise.                                                    | 95    | -    |

|                                           |                                                                                     |      |      |
|-------------------------------------------|-------------------------------------------------------------------------------------|------|------|
| "Squat down"                              | Agent does a squat.                                                                 | 95   | -    |
| "Lateral step"                            | Agent does a step to the right and then a step to the left while facing the camera. | 90   | -    |
| "Lateral kick"                            | Agent does a side-kicks while facing the camera.                                    | 90   | -    |
| <b>Object related individual actions</b>  |                                                                                     |      |      |
| "Shoveling"                               | Agent moves something with a shovel.                                                | 72.5 | -    |
| "Lifting the box"                         | Agent squats down and lifts up a box.                                               | 45   | -    |
| "Chopping wood"                           | Agent chops the wood with an axe.                                                   | 65   | -    |
| "Sawing"                                  | Agent uses hand saw to cut wood.                                                    | 12.5 | -    |
| "Digging"                                 | Agent is digging a hole with a shovel.                                              | 97.5 | -    |
| "Sweeping the floor"                      | Agent is sweeping a floor with a broom.                                             | 97.5 | -    |
| "Drinking"                                | Agent raises a glass and drinks something from it.                                  | 70   | -    |
| "Hammering a nail"                        | Agent is hammering a nail.                                                          | 82.5 | -    |
| "Brushing teeth"                          | Agent is brushing teeth with right hand.                                            | 50   | -    |
| <b>Synchronous activity of two agents</b> |                                                                                     |      |      |
| "Dancing"                                 | A and B perform a dance routine.                                                    | 100  | 67.5 |
| "Fencing"                                 | A and B practice fencing.                                                           | 95   | 95   |
| "Football"                                | A and B play football.                                                              | 100  | 100  |
| "Throwing the ball"                       | A throws the ball to B, B catches and throws it back to A.                          | 90   | 100  |
| "Boxing"                                  | A and B throw punches at each other while boxing.                                   | 100  | 100  |
| "Kickboxing"                              | A and B perform a kickboxing routine.                                               | 92.5 | 97.5 |
